# Supplementary material for: Experimental investigation of the thermal transport properties of a carbon nanohybrid dispersed nanofluid
Source: Royal Society of Chemistry journal article supplement (doi:10.1039/c0nr01024c), 2011-01-01
Supplement: c0nr01024c.pdf [file c0nr01024c.pdf]

## Supplementary Information

### Experimental investigation of thermal transport properties of carbon nanohybrid dispersed nanofluid

Tessy Theres Baby and Sundara Ramaprabhu \*

Alternative Energy and Nanotechnology Laboratory (AENL), Nano Functional Materials Technology centre (NFMTC), Department of Physics, Indian Institute of Technology Madras, India

\*Corresponding author. Phone: +91-44-22574862; fax: +91-44-22570509 E-mail: [ramp@iitm.ac.in](mailto:ramp@iitm.ac.in)

#### 1. Analysis of Raman data

Raman spectra undergo changes that are similar to those observed in the graphite to amorphous carbon transition after functionalization. When carbon based materials are functionalized, the G band broadens significantly and displays a shift to higher frequencies (blue-shift) and the D band grows in intensity. Curve fitting has been done using Lorentzian function. Figure 1, 2 & 3 corresponding to curve fitting corresponding to f-MWNT, f-HEG and f-MWNT+f-HEG. The fitting parameters are given in table 1. f-MWNT is more graphitic in nature compared to f-HEG. The G-band peak position of f-MWNT+f-HEG and f-HEG has been blue shifted compared to that of f-MWNT. There are several possible explanations for this blue shift. First, in f-MWNT with a sufficient concentration of defects, there is another band, D $\square$ -band, located at 1607 cm<sup>-1</sup>, which can partially merge with the G band. The explanation given for the appearance of this band is that in graphite, there is a non-zero phonon density of states above the G band; such phonons, which are usually Raman-inactive, become active due to phonon confinement caused by the defects [1]. Second, when going from a graphite crystal to a single graphene sheet, the G band shifts; this shift could also be partially responsible for the higher G band frequencies [2]. Finally, isolated double bonds resonate at higher frequencies than the G band of graphite, [3] although the specific patterns of the double bonds causing such an up shift. Compared to the G band of graphite, the blue-shifted peaks due to the first two causes are usually relatively weak.

The G-band in f-HEG is broadened compared to that in f-MWNT. The G-band is normally due to the one to one vibration of carbon atoms. So the broadening in f-HEG can be due to the 2 dimensional structure of graphene which gives more carbon-carbon vibrational sites. In addition to G-band, there is a small D $\square$ -band in f-MWNT. In the case of f-MWNT+f-HEG, the G-band is more broadened. This may be because of the merging of G-band in f-HEG and D $\square$ -band in f-MWNT.

Lorentz function used for fitting

$$y = y_0 + \frac{2A}{\pi} \frac{W}{4(X - Xc)^2 + W^2}$$

The fitting parameters

| Parameters | f-MWNT                | f-HEG                 | f-MWNT+f-HEG          |
|------------|-----------------------|-----------------------|-----------------------|
| $y_0$      | 1009                  | 1052                  | 1017                  |
| Xc1        | 1339 cm <sup>-1</sup> | 1366 cm <sup>-1</sup> | 1357 cm <sup>-1</sup> |
| W1         | 57 cm <sup>-1</sup>   | 162 cm <sup>-1</sup>  | 100 cm <sup>-1</sup>  |
| A1         | 5085                  | 20029                 | 4759                  |
| Xc2        | 1568 cm <sup>-1</sup> | 1599 cm <sup>-1</sup> | 1589 cm <sup>-1</sup> |
| W2         | 42 cm <sup>-1</sup>   | 65 cm <sup>-1</sup>   | 66 cm <sup>-1</sup>   |
| A2         | 4291                  | 6792                  | 3440                  |
| Xc3        | 1607 cm <sup>-1</sup> |                       |                       |
| W3         | 22 cm <sup>-1</sup>   |                       |                       |
| A3         | 336                   |                       |                       |

$y_0$  = Y- intercept, Xc1= D-band position, W1= width of D-band, A1= area under D-band, Xc2= G-band position, W2= width of G-band, A2= area under G-band, Xc3= D $\square$ -band position, W3= width of D $\square$ -band, A3= area under D $\square$ -band.

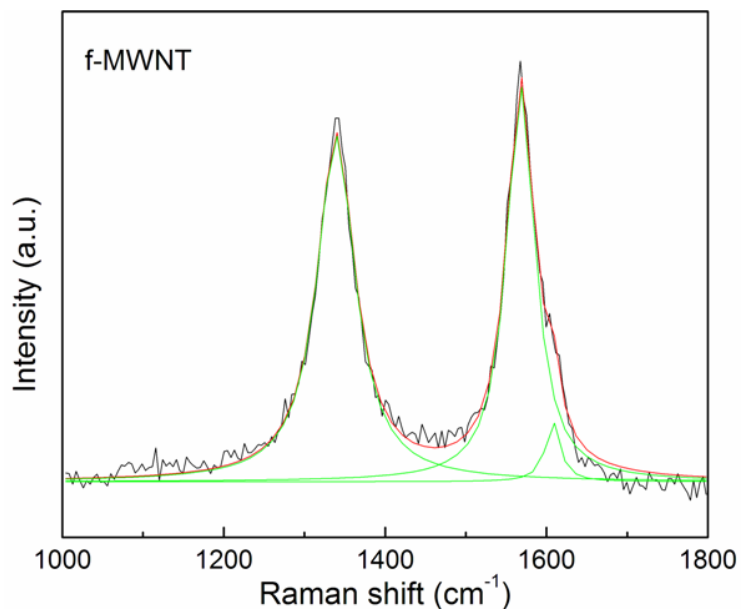

Figure 1. Curve fitting for f-MWNT

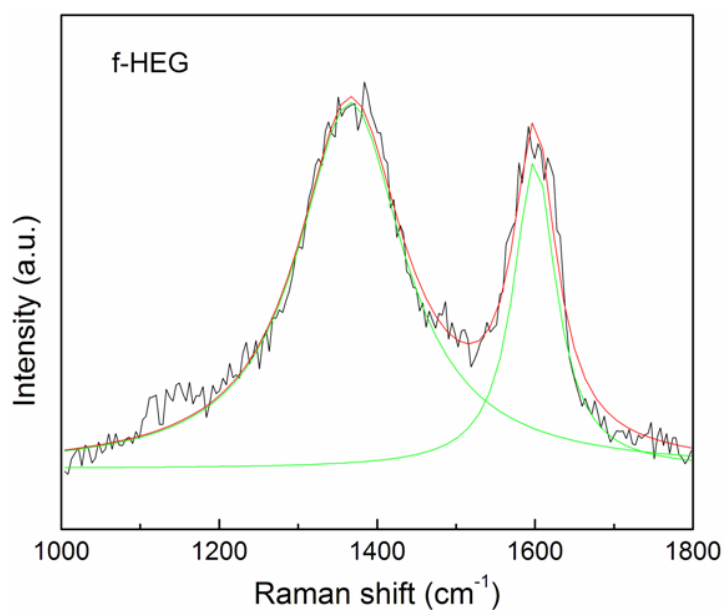

Figure 2. Curve fitting for f-HEG

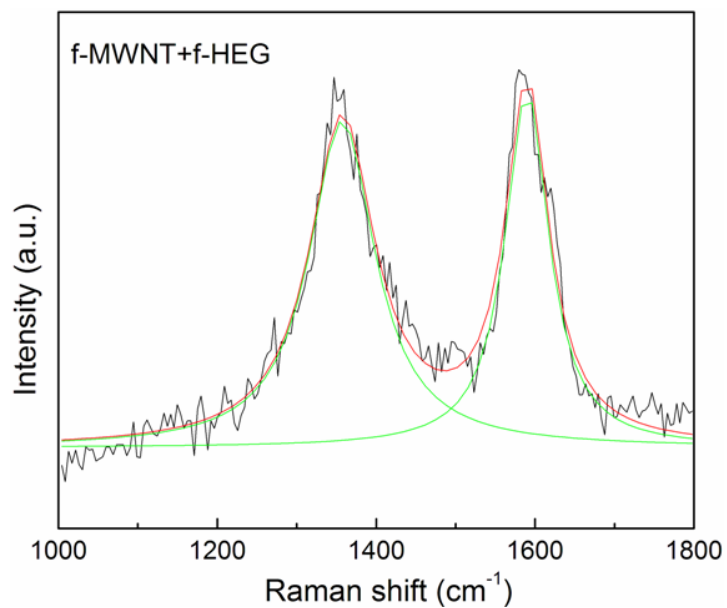

Figure 3. Curve fitting for f-MWNT+f-HEG

## 2. Mechanism

The figure 4 explains the possible role of f-MWNT in f-MWNT+f-HEG in powder form. f-MWNT acts as spacer between the few layer graphene sheets as shown in figure. This avoids the restacking of graphene sheets.

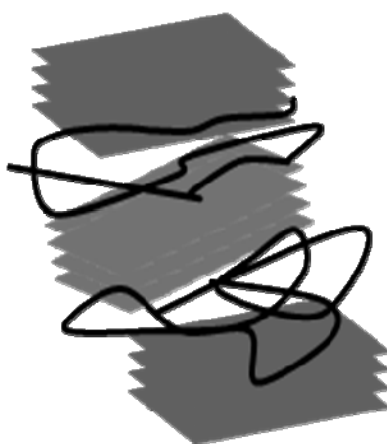

Figure 4. Role of f-MWNT in powder f-MWNT+f-HEG

When f-MWNT+f-HEG is dispersed in base fluid, the sheets will separate further. f-MWNT acts like a network which connect the f-HEG layers (see figure 5). If the percolation is more then, the conductivity also will be more. When the volume fraction increases also the particle – particle contact increases.

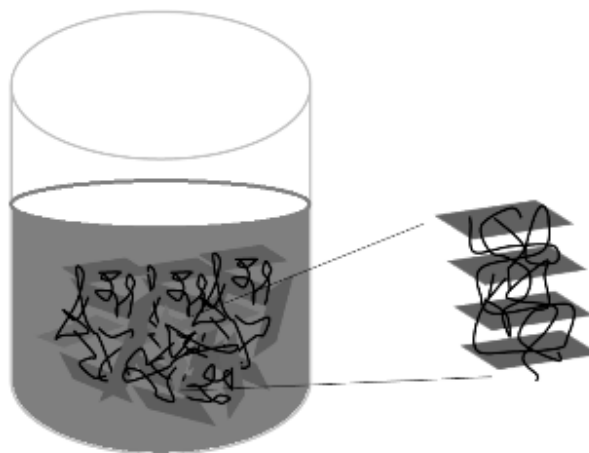

Figure 5. Role of f-MWNT in nanofluid contains f-MWNT+f-HEG

## References

- [1] Cancado, L. G.; Pimenta, M. A.; Neves, B. R. A.; Dantas, M. S. S.; Jorio, A. *Phys. Rev. Lett.* **2004**, *93*, 247401.
- [2] Graf, D.; Molitor, F.; Ensslin, K.; Stampfer, C.; Jungen, A.; Hierold, C.; Wirtz, L. *Nano Lett.* **2007**, *7*, 238.
- [3] Ferrari, A. C.; Robertson, J. *Phys. Rev. B* **2000**, *61*, 14095.
